# Supplementary material for: Development of the Perineal Health Behavior Scale: Data from Rural Women in Huaning County, Yunnan Province, China
Source: Research Square preprint supplement (doi:10.21203/rs.3.rs-3739833/v1), 2023-12-14
Supplement: Supplementary file 1 [file d25262ad0171257092c9c549.docx]

**Supplementary Material**

| **Supplementary Table 1. Sociodemographic characteristics of participants** | | | | |
| --- | --- | --- | --- | --- |
| Variables |  | | N | Percentage (%) |
| Age | | <30 years old | 326 | 23.3 |
|  | | 30-34 years old | 424 | 30.4 |
|  | | 35-39 years old | 379 | 27.1 |
|  | | ≥40 years old | 268 | 19.2 |
| Residence | | Remote rural area | 593 | 42.4 |
|  | | Suburban rural area | 804 | 57.6 |
| Nationalities | | Han | 965 | 69.1 |
|  | | Minorities | 432 | 30.9 |
| Marriage status | | Married | 1291 | 92.4 |
|  | | Non-married | 106 | 7.6 |
| Academic qualifications | | Primary and below | 217 | 15.5 |
|  | | Junior high school | 705 | 50.5 |
|  | | High school and above | 475 | 34.0 |
| Occupations | | Farming | 903 | 64.6 |
|  | | Non-farming | 494 | 35.4 |
| Monthly income | | ≤ 3,000 yuan | 1074 | 76.9 |
|  | | ˃ 3,000 yuan | 323 | 23.1 |

**Supplementary Table 2. Spearman correlation analysis of PHBS content validity**

| Spearman’s Coefficient | PHBS | F1: Daily life | F2: Sexual life |
| --- | --- | --- | --- |
| PHBS | 1.000 |  |  |
| Daily life factor | 0.858 | 1.000 |  |
| Sex factor | 0.817 | 0.431 | 1.000 |
| P1 | 0.573 | 0.627 | 0.329 |
| P2 | 0.649 | 0.743 | 0.333 |
| P3 | 0.668 | 0.751 | 0.365 |
| P4 | 0.588 | 0.670 | 0.315 |
| P5 | 0.492 | 0.599 | 0.224 |
| P6 | 0.497 | 0.594 | 0.230 |
| P7 | 0.461 | 0.529 | 0.236 |
| P8 | 0.693 | 0.389 | 0.818 |
| P9 | 0.698 | 0.387 | 0.832 |
| P10 | 0.712 | 0.388 | 0.854 |
| P11 | 0.693 | 0.357 | 0.860 |
